# Supplementary material
Source: publisher figshare collection journal article supplement (https://karger.figshare.com/ndownloader/files/27682611)
Supplement: Supplementary file 1 [file 27682611]

Supplementary File

**Supplementary File 1.** The full strings used for bibliographic searches in PubMed, Cochrane Library, Japan Medical Abstracts Society, and Web of Science

Search terms

Pubmed (N = 823)

(Search "Duodenal Neoplasms"[mh] OR "Ileal Neoplasms"[mh] OR "Jejunal Neoplasms"[mh] OR ("Intestinal Neoplasms"[mh] AND "Intestine, Small"[mh])) AND ((Search "Adenomatous Polyposis Coli/diagnosis"[mh] OR "Adenomatous Polyposis Coli/pathology"[mh]) OR (Search "Alcohol Drinking"[mh] OR "Helicobacter Infections"[mh] OR "Smoking"[mh] OR "Risk Factors"[mh]) OR (Search prognostic factor*[tiab]) OR (Search gastric metaplasia[tiab])) AND (Publication date to 2019/03/31)

Cochrane (N = 25)

(([mh "Duodenal Neoplasms"] OR [mh "Ileal Neoplasms"] OR [mh "Jejunal Neoplasms"] OR ([mh "Intestinal Neoplasms"] AND [mh "Intestine, Small"])) OR (small bowel NEAR/3 (cancer OR carcinoma OR adenocarcinoma):ti,ab,kw) OR (duodenal NEAR/3 (cancer OR carcinoma OR adenocarcinoma):ti,ab,kw)) AND (([mh "Alcohol Drinking"] OR [mh "Helicobacter Infections"] OR [mh "Smoking"] OR [mh "Risk Factors"]) OR ((alcohol OR helicobacter OR smoking OR ((risk OR prognostic) NEXT factor*) OR "gastric metaplasia"):ti,ab,kw)) AND (in Trials)

Japan Medical Abstracts Society (N = 348)

((Intestinal neoplasms (in Japanese)/TH) AND (Alcohol Drinking (in Japanese)/TH or Smoking (in Japanese)/TH or Helicobacter Infections (in Japanese)/TH or Risk Factors (in Japanese)/TH or Adenomatous Polyposis Coli (in Japanese)/TH or Gastric Metaplasia (in Japanese)/TH)) AND (PDAT=//:2019/3/31)

Web of Science (N = 69)

("Duodenal Neoplasms" OR "Ileal Neoplasms" OR "Jejunal Neoplasms" OR ("Intestinal Neoplasms" AND "Intestine, Small")) AND ("Adenomatous Polyposis Coli" OR "Alcohol Drinking" OR "Helicobacter Infections" OR "Smoking" OR "Risk Factors" OR "Gastric Metaplasia")
